# Supplementary material
Source: publisher figshare collection journal article supplement (https://geolsoc.figshare.com/ndownloader/files/34986379)
Supplement: Supplementary file 1 [file 34986379]

Depth [m]	Substrate [mM]	Substrate delta	Substrate light isotope [mM]
0	28.9	21	27.6304
1	28.7601	21.2851	27.4963
2	28.619	21.5738	27.3611
3	28.4768	21.8661	27.2248
4	28.3334	22.1621	27.0874
5	28.1894	22.4609	26.9493
6	28.0456	22.7606	26.8115
7	27.9026	23.0599	26.6744
8	27.7609	23.3581	26.5386
9	27.6206	23.6543	26.4042
10	27.4821	23.9483	26.2715
11	27.3455	24.2395	26.1405
12	27.2109	24.5276	26.0115
13	27.0783	24.8124	25.8845
14	26.948	25.0936	25.7596
15	26.8198	25.3711	25.6368
16	26.6939	25.6447	25.5161
17	26.5703	25.9143	25.3976
18	26.4489	26.1797	25.2814
19	26.3299	26.4409	25.1673
20	26.2131	26.6978	25.0554
21	26.0987	26.9502	24.9458
22	25.9865	27.1982	24.8383
23	25.8766	27.4418	24.7329
24	25.7689	27.6809	24.6298
25	25.6634	27.9154	24.5287
26	25.5601	28.1455	24.4297
27	25.459	28.371	24.3328
28	25.36	28.5921	24.238
29	25.2631	28.8086	24.1451
30	25.1682	29.0207	24.0543
31	25.0754	29.2283	23.9653
32	24.9845	29.4315	23.8783
33	24.8956	29.6304	23.7931
34	24.8086	29.825	23.7097
35	24.7235	30.0153	23.6282
36	24.6401	30.2015	23.5483
37	24.5586	30.3835	23.4702
38	24.4787	30.5615	23.3937
39	24.4006	30.7355	23.3189
40	24.3241	30.9055	23.2456
41	24.2491	31.0718	23.1738
42	24.1758	31.2342	23.1035
43	24.104	31.3929	23.0348
44	24.0337	31.5477	22.9675
45	23.965	31.6988	22.9016
46	23.8977	31.8462	22.8372
47	23.8319	31.9898	22.7741
48	23.7675	32.1298	22.7125
49	23.7045	32.2661	22.6521
50	23.6429	32.3987	22.5932
51	23.5827	32.5278	22.5355
52	23.5238	32.6533	22.4791
53	23.4662	32.7753	22.4239
54	23.4099	32.8938	22.37
55	23.3549	33.0089	22.3174
56	23.3011	33.1205	22.2659
57	23.2486	33.2288	22.2156
58	23.1972	33.3337	22.1664
59	23.147	33.4355	22.1183
60	23.098	33.534	22.0713
61	23.05	33.6293	22.0254
62	23.0031	33.7215	21.9806
63	22.9574	33.8107	21.9367
64	22.9126	33.8969	21.8939
65	22.8689	33.9802	21.852
66	22.8261	34.0606	21.8111
67	22.7843	34.1382	21.7711
68	22.7435	34.213	21.732
69	22.7035	34.2851	21.6937
70	22.6644	34.3546	21.6563
71	22.6262	34.4216	21.6198
72	22.5889	34.486	21.584
73	22.5523	34.548	21.549
74	22.5165	34.6077	21.5148
75	22.4815	34.6651	21.4812
76	22.4472	34.7202	21.4484
77	22.4136	34.7732	21.4163
78	22.3807	34.8241	21.3848
79	22.3485	34.8731	21.3539
80	22.3168	34.9201	21.3237
81	22.2858	34.9652	21.294
82	22.2554	35.0085	21.2649
83	22.2255	35.0502	21.2363
84	22.1961	35.0902	21.2082
85	22.1673	35.1286	21.1806
86	22.1389	35.1656	21.1534
87	22.111	35.2012	21.1267
88	22.0835	35.2354	21.1004
89	22.0564	35.2684	21.0745
90	22.0296	35.3003	21.0489
91	22.0033	35.331	21.0237
92	21.9772	35.3607	20.9988
93	21.9515	35.3895	20.9741
94	21.926	35.4175	20.9498
95	21.9008	35.4446	20.9257
96	21.8758	35.4711	20.9018
97	21.851	35.497	20.8781
98	21.8264	35.5223	20.8545
99	21.802	35.5472	20.8311
100	21.7776	35.5717	20.8079
101	21.7534	35.596	20.7847
102	21.7293	35.6199	20.7617
103	21.7053	35.6435	20.7387
104	21.6814	35.6668	20.7159
105	21.6577	35.6899	20.6931
106	21.634	35.7126	20.6705
107	21.6104	35.7349	20.648
108	21.587	35.757	20.6256
109	21.5637	35.7787	20.6033
110	21.5405	35.8001	20.5811
111	21.5174	35.8214	20.559
112	21.4945	35.8425	20.5371
113	21.4717	35.8633	20.5153
114	21.449	35.8841	20.4936
115	21.4264	35.9046	20.472
116	21.4039	35.9249	20.4505
117	21.3816	35.945	20.4292
118	21.3594	35.9649	20.4079
119	21.3374	35.9846	20.3868
120	21.3154	36.0041	20.3659
121	21.2936	36.0234	20.345
122	21.272	36.0425	20.3243
123	21.2505	36.0614	20.3038
124	21.2291	36.08	20.2833
125	21.2078	36.0984	20.263
126	21.1867	36.1166	20.2428
127	21.1658	36.1345	20.2228
128	21.145	36.1522	20.2029
129	21.1243	36.1697	20.1831
130	21.1038	36.1869	20.1635
131	21.0834	36.2039	20.144
132	21.0632	36.2206	20.1247
133	21.0431	36.2371	20.1055
134	21.0232	36.2533	20.0864
135	21.0034	36.2693	20.0675
136	20.9838	36.285	20.0487
137	20.9643	36.3004	20.0301
138	20.945	36.3156	20.0116
139	20.9258	36.3304	19.9933
140	20.9068	36.345	19.9752
141	20.888	36.3594	19.9572
142	20.8693	36.3734	19.9393
143	20.8508	36.3872	19.9216
144	20.8324	36.4006	19.9041
145	20.8142	36.4138	19.8867
146	20.7962	36.4267	19.8694
147	20.7784	36.4393	19.8524
148	20.7607	36.4516	19.8354
149	20.7432	36.4635	19.8187
150	20.7258	36.4752	19.8021
151	20.7086	36.4865	19.7857
152	20.6916	36.4976	19.7694
153	20.6748	36.5083	19.7533
154	20.6581	36.5187	19.7374
155	20.6416	36.5288	19.7217
156	20.6253	36.5385	19.7061
157	20.6092	36.5479	19.6906
158	20.5932	36.557	19.6754
159	20.5775	36.5657	19.6603
160	20.5619	36.5741	19.6454
161	20.5465	36.5822	19.6307
162	20.5312	36.5899	19.6161
163	20.5162	36.5973	19.6017
164	20.5013	36.6043	19.5875
165	20.4867	36.6109	19.5735
166	20.4722	36.6172	19.5597
167	20.4579	36.6231	19.546
168	20.4438	36.6287	19.5325
169	20.4299	36.6339	19.5192
170	20.4161	36.6387	19.5061
171	20.4026	36.6432	19.4932
172	20.3893	36.6473	19.4804
173	20.3761	36.651	19.4679
174	20.3632	36.6543	19.4555
175	20.3504	36.6572	19.4433
176	20.3379	36.6598	19.4313
177	20.3255	36.6619	19.4195
178	20.3134	36.6637	19.4079
179	20.3014	36.6651	19.3965
180	20.2896	36.666	19.3852
181	20.2781	36.6666	19.3742
182	20.2667	36.6668	19.3634
183	20.2556	36.6665	19.3527
184	20.2447	36.6659	19.3423
185	20.2339	36.6648	19.332
186	20.2234	36.6633	19.3219
187	20.2131	36.6614	19.3121
188	20.203	36.6591	19.3024
189	20.1931	36.6564	19.293
190	20.1834	36.6532	19.2837
191	20.1739	36.6497	19.2747
192	20.1647	36.6456	19.2658
193	20.1556	36.6412	19.2572
194	20.1468	36.6363	19.2487
195	20.1381	36.631	19.2405
196	20.1297	36.6252	19.2325
197	20.1216	36.619	19.2247
198	20.1136	36.6124	19.2171
199	20.1058	36.6053	19.2097
200	20.0983	36.5978	19.2025
201	20.091	36.5898	19.1955
202	20.0839	36.5814	19.1888
203	20.0771	36.5725	19.1822
204	20.0704	36.5631	19.1759
205	20.064	36.5533	19.1698
206	20.0578	36.5431	19.1639
207	20.0519	36.5323	19.1582
208	20.0461	36.5211	19.1527
209	20.0406	36.5095	19.1475
210	20.0354	36.4974	19.1424
211	20.0303	36.4848	19.1376
212	20.0255	36.4717	19.133
213	20.0209	36.4582	19.1287
214	20.0166	36.4442	19.1245
215	20.0124	36.4297	19.1206
216	20.0086	36.4147	19.1169
217	20.0049	36.3993	19.1134
218	20.0015	36.3834	19.1101
219	19.9983	36.367	19.1071
220	19.9953	36.3501	19.1043
221	19.9926	36.3328	19.1017
222	19.9901	36.315	19.0993
223	19.9879	36.2967	19.0972
224	19.9858	36.2779	19.0953
225	19.9841	36.2587	19.0936
226	19.9825	36.2389	19.0921
227	19.9812	36.2187	19.0909
228	19.9801	36.198	19.0899
229	19.9793	36.1768	19.0891
230	19.9787	36.1552	19.0886
231	19.9783	36.133	19.0882
232	19.9782	36.1104	19.0881
233	19.9783	36.0873	19.0883
234	19.9787	36.0637	19.0886
235	19.9793	36.0396	19.0892
236	19.9801	36.0151	19.09
237	19.9812	35.99	19.0911
238	19.9825	35.9645	19.0923
239	19.984	35.9385	19.0938
240	19.9858	35.912	19.0956
241	19.9879	35.885	19.0976
242	19.9902	35.8576	19.0998
243	19.9927	35.8296	19.1022
244	19.9954	35.8012	19.1049
245	19.9984	35.7723	19.1078
246	20.0017	35.7429	19.1109
247	20.0052	35.713	19.1142
248	20.0089	35.6826	19.1178
249	20.0129	35.6518	19.1217
250	20.0171	35.6205	19.1257
251	20.0216	35.5887	19.13
252	20.0263	35.5564	19.1346
253	20.0313	35.5236	19.1394
254	20.0365	35.4904	19.1444
255	20.042	35.4566	19.1496
256	20.0477	35.4224	19.1551
257	20.0536	35.3877	19.1608
258	20.0598	35.3526	19.1668
259	20.0663	35.3169	19.173
260	20.073	35.2808	19.1794
261	20.0799	35.2442	19.186
262	20.0871	35.2071	19.193
263	20.0946	35.1696	19.2001
264	20.1023	35.1316	19.2075
265	20.1102	35.0931	19.2151
266	20.1184	35.0541	19.223
267	20.1269	35.0147	19.2311
268	20.1356	34.9748	19.2394
269	20.1445	34.9344	19.248
270	20.1537	34.8936	19.2568
271	20.1632	34.8522	19.2659
272	20.1729	34.8104	19.2752
273	20.1828	34.7682	19.2847
274	20.193	34.7255	19.2945
275	20.2035	34.6823	19.3046
276	20.2142	34.6387	19.3148
277	20.2252	34.5946	19.3254
278	20.2364	34.55	19.3361
279	20.2479	34.505	19.3471
280	20.2596	34.4595	19.3584
281	20.2716	34.4136	19.3699
282	20.2838	34.3672	19.3816
283	20.2963	34.3204	19.3936
284	20.3091	34.2731	19.4058
285	20.3221	34.2253	19.4183
286	20.3354	34.1771	19.431
287	20.3489	34.1285	19.444
288	20.3627	34.0794	19.4572
289	20.3767	34.0299	19.4707
290	20.391	33.9799	19.4844
291	20.4056	33.9295	19.4983
292	20.4204	33.8786	19.5125
293	20.4355	33.8273	19.527
294	20.4508	33.7756	19.5417
295	20.4664	33.7234	19.5566
296	20.4823	33.6708	19.5718
297	20.4984	33.6178	19.5872
298	20.5148	33.5644	19.6029
299	20.5314	33.5105	19.6189
300	20.5483	33.4562	19.6351
301	20.5654	33.4014	19.6515
302	20.5829	33.3463	19.6682
303	20.6005	33.2907	19.6851
304	20.6185	33.2347	19.7023
305	20.6367	33.1783	19.7198
306	20.6552	33.1214	19.7375
307	20.6739	33.0642	19.7554
308	20.6929	33.0065	19.7736
309	20.7121	32.9485	19.7921
310	20.7317	32.89	19.8108
311	20.7514	32.8311	19.8297
312	20.7715	32.7718	19.8489
313	20.7918	32.7121	19.8684
314	20.8124	32.6521	19.8881
315	20.8332	32.5916	19.9081
316	20.8543	32.5307	19.9283
317	20.8757	32.4695	19.9488
318	20.8973	32.4078	19.9695
319	20.9193	32.3458	19.9905
320	20.9414	32.2834	20.0117
321	20.9639	32.2206	20.0332
322	20.9866	32.1574	20.055
323	21.0095	32.0938	20.077
324	21.0328	32.0299	20.0993
325	21.0563	31.9656	20.1218
326	21.0801	31.9009	20.1446
327	21.1041	31.8359	20.1676
328	21.1284	31.7705	20.1909
329	21.153	31.7047	20.2144
330	21.1779	31.6385	20.2382
331	21.203	31.572	20.2623
332	21.2284	31.5052	20.2866
333	21.254	31.438	20.3112
334	21.28	31.3704	20.3361
335	21.3062	31.3025	20.3612
336	21.3327	31.2342	20.3865
337	21.3594	31.1656	20.4121
338	21.3864	31.0966	20.438
339	21.4137	31.0273	20.4642
340	21.4413	30.9577	20.4905
341	21.4691	30.8878	20.5172
342	21.4972	30.8175	20.5441
343	21.5256	30.7469	20.5713
344	21.5542	30.6759	20.5987
345	21.5831	30.6047	20.6264
346	21.6123	30.5331	20.6544
347	21.6418	30.4612	20.6826
348	21.6715	30.389	20.7111
349	21.7015	30.3164	20.7399
350	21.7318	30.2436	20.7689
351	21.7624	30.1704	20.7981
352	21.7932	30.0969	20.8277
353	21.8243	30.0232	20.8575
354	21.8557	29.9492	20.8875
355	21.8873	29.875	20.9178
356	21.9192	29.8004	20.9483
357	21.9513	29.7257	20.979
358	21.9836	29.6507	21.01
359	22.0162	29.5755	21.0413
360	22.049	29.5001	21.0727
361	22.0821	29.4245	21.1044
362	22.1154	29.3487	21.1362
363	22.1488	29.2728	21.1683
364	22.1826	29.1967	21.2006
365	22.2165	29.1204	21.2331
366	22.2506	29.044	21.2657
367	22.2849	28.9675	21.2986
368	22.3194	28.8908	21.3317
369	22.3542	28.8141	21.3649
370	22.3891	28.7372	21.3984
371	22.4241	28.6603	21.432
372	22.4594	28.5833	21.4657
373	22.4948	28.5062	21.4997
374	22.5304	28.429	21.5338
375	22.5662	28.3518	21.568
376	22.6021	28.2745	21.6024
377	22.6382	28.1973	21.637
378	22.6745	28.12	21.6717
379	22.7108	28.0426	21.7066
380	22.7474	27.9653	21.7415
381	22.784	27.888	21.7767
382	22.8208	27.8107	21.8119
383	22.8578	27.7334	21.8473
384	22.8948	27.6561	21.8828
385	22.932	27.5789	21.9184
386	22.9693	27.5017	21.9541
387	23.0067	27.4246	21.9899
388	23.0443	27.3475	22.0259
389	23.0819	27.2705	22.0619
390	23.1196	27.1936	22.098
391	23.1574	27.1168	22.1343
392	23.1953	27.0401	22.1706
393	23.2333	26.9634	22.207
394	23.2714	26.8869	22.2435
395	23.3096	26.8105	22.28
396	23.3478	26.7342	22.3166
397	23.3862	26.658	22.3533
398	23.4245	26.582	22.3901
399	23.463	26.5061	22.4269
400	23.5015	26.4304	22.4638
401	23.54	26.3548	22.5007
402	23.5786	26.2794	22.5377
403	23.6173	26.2041	22.5747
404	23.656	26.1291	22.6118
405	23.6947	26.0542	22.6489
406	23.7335	25.9795	22.686
407	23.7723	25.905	22.7232
408	23.8111	25.8307	22.7604
409	23.85	25.7566	22.7976
410	23.8889	25.6827	22.8348
411	23.9277	25.609	22.872
412	23.9666	25.5356	22.9093
413	24.0055	25.4624	22.9465
414	24.0444	25.3894	22.9838
415	24.0833	25.3167	23.0211
416	24.1222	25.2442	23.0583
417	24.1611	25.172	23.0956
418	24.2	25.1	23.1328
